# Supplementary material
Source: Research Square preprint supplement (doi:10.21203/rs.3.rs-9263061/v1)
Supplement: Supplementary file 1 [file 785b6055ed64c772dbb2b0ce.docx]

Supplementary Tab. 1 Characteristics of seventeen adult patients who underwent modified S-S bypass.

| Patient | Age (yrs) | Gender | Onset to S-S pass(mos) | Main complaint | Frankle Grade | Previous surgery | Preoperative Syrinx | Obstructed levels | Surgical treatment | Follow-up  (mos) | Symptom evolution |
| --- | --- | --- | --- | --- | --- | --- | --- | --- | --- | --- | --- |
| 1 | 39 | M | 36 | Right lower limb weakness with right-sided numbness | D | Lumbar spine trauma surgery, 16 years ago | C1-T12 | L1 | T11、L2 | 12 | Improvement |
| 2 | 47 | M | 72 | Right-sided numbness and motor impairment | D | Lumbar spine fracture surgery, 30 years ago | C1-T12 | T12 | T10、T12 | 15 | Improvement |
| 3 | 27 | M | 96 | Decreased sensation in right upper limb, shoulder, chest, and neck | B | Thoracic spine surgery, 10 years ago | C1-T10 | T7 | T4、T9 | 13 | Improvement |
| 4 | 42 | M | 3 | Right neck/shoulder pain/discomfort, decreased pain/temp sensation | D | Lumbar spine fracture surgery, 20 years ago | C1-T11 | L1 | T11、L2 | 16 | Improvement |
| 5 | 48 | M | 168 | Bilateral lower limb weakness, neck discomfort | D | Thoracic decompression, 14 years ago | T3-T6 | T5 | T4、T6 | 16 | Stable |
| 6 | 36 | F | 7 | Bilateral lower limb weakness, walking difficulty | D | Posterior fossa lesion resection, 8 months ago | C7-T12 | T5 | T2、T6 | 14 | Improvement |
| 7 | 39 | F | 24 | Bilateral lower limb numbness | D | Thoracic surgery, 1 year after initial procedure | C1-T2、T12-L1 | T1 | C5、T2 | 14 | Improvement |
| 8 | 38 | M | 48 | Right upper limb numbness | C | Lumbar spine trauma surgery, 19 years ago | T6-T11 | T12 | T10、L2 | 13 | Improvement |
| 9 | 31 | M | 168 | Bilateral lower limb weakness, with left upper limb pain and numbness | A | Thoracic surgery for tuberculosis, 28 years ago | C2-T1 | T9 | T4、T10 | 13 | Improvement |
| 10 | 59 | M | 120 | Loss of pain/temp sensation in the right upper limb, with bilateral lower limb pain | D | Thoracolumbar corrective fusion with internal fixation, 3 years ago | C1-L1 | L1 | T11、L2 | 12 | Improvement |
| 11 | 55 | F | 96 | Bilateral lower limb weakness, walking difficulty | D | Intramedullary lesion resection, 32 years ago | T6-T8 | T11 | T3、T10 | 13 | Stable |
| 12 | 32 | M | 96 | High bilateral lower limb muscle tone, worsening with poor urinary control | C | Resection of intraspinal schwannoma, 8 years ago | C7-T11 | T10 | T5、T11 | 12 | Improvement |
| 13 | 46 | M | 60 | Lower back pain accompanied by left lower limb pain and weakness, walking difficulty | C | Thoracolumbar surgery, 21 years ago | C1-T12 | L1 | T10、L2 | 11 | Improvement |
| 14 | 44 | M | 12 | Lower back pain, numbness in calves and feet, walking difficulty | D | Ventriculoperitoneal shunt placement for hydrocephalus, 21 years ago | C1-T2、T8-T11 | T9 | T6、T12 | 16 | Improvement |
| 15 | 59 | F | 12 | Low back pain, bilateral lower limb numbness and weakness | D | Cervical spine surgery, 1 year ago | T5-T12 | L1 | T10、L2 | 17 | Improvement |
| 16 | 45 | M | 14 | Chest, back, and right shoulder pain accompanied by upper right limb pain and decreased temperature perception | D | Lumbar decompression, 16 years ago | C3-T6 | T3 | C6、T3 | 16 | Improvement |
| 17 | 64 | M | 96 | Decreased pain/temp sensation right hand, right hand motor impairment | D | Lumbar spine surgery, 8 years ago | C1-T12 | T11 | T11、L4 | 15 | Improvement |

*yrs, years; mos, months.
